# Supplementary material for: Antioxidant or neurotrophic factor treatment preserves function in a mouse model of neovascularization-associated oxidative stress
Source: JCI journal article supplement (doi:10.1172/jci35977), 2009-02-02
Supplement: sd1 [file 1]

## Supplementary Materials and Methods (Metabolomics analysis)

**Metabolite extraction and mass spectrometry analysis.** 12 *Vldlr*<sup>-/-</sup> knock out and 12 wild type (WT) retinas were separately frozen at -80 °C in 50µL PBS until used, at which point metabolites were extracted and proteins were precipitated by adding 600µL of cold acetone to the cell pellet. Samples were then vortexed-mixed for 30 sec and submerged for 1 min in liquid nitrogen followed by thawing (2-3 minutes) and sonication for 10 min at 50 °C. This process was repeated three times followed by freezing at -20 °C for 1h. The pellet was removed by centrifugation at 16,000 x g for 10 min and the supernatant was transferred to a clean tube. 400 µL of cold methanol/water/formic acid (86.5/12.5/1.0) was added to the pellet followed by vortex-mixing for 30 sec, sonication for 15 min at 50 °C and freezing for 60 min at -20 °C. The pellet was again removed by centrifugation at 16,000 x g for 10 min, and supernatant was pooled with the first extraction in the clean tube. Samples were dried in a SpeedVac to dryness. 100 µL of 95% ACN/water was added to the dried samples followed by vortex-mixing and sonication in a bath sonicator for 5 min. Samples were centrifuged at 16,000 x g and the supernatant was removed to a clean LC-MS vial. The samples were maintained at 4 °C in the autosampler and analyzed by LC-MS.

**Liquid chromatography-MS (LC-MS).** 4 µL of processed retina sample were injected for each run. Reverse phase chromatography was performed using a 150 by 0.5mm (diameter) Zorbax C18 column with 5µm particles, at a flow rate of 20 µL/min. The LC system was an Agilent 1100 with a capillary pump. Buffer A was water with (+ ion mode) or without (- ion mode) 0.1% formic acid, and buffer B was acetonitrile with (+ ion mode) or without (- ion mode) 0.1% formic acid. For the endcapped C18 column, the column was equilibrated in 90% buffer A, and the samples were run with a gradient of 10%-98% over 60min. HILIC chromatography was performed using a 150 by 1.0mm (diameter) SeQuant ZIC<sup>®</sup>-HILIC column with 3.5µm particles, at a flow rate of

50  $\mu$ L/min. The LC system was an Agilent 1100 with a capillary pump. Buffer A was water in 5mM ammonium acetate, and buffer B was 90% acetonitrile/10% water in 5mM ammonium acetate. The column was equilibrated in 90% B, and the samples were run using a gradient of 90%-40% over 15min.

**Mass Spectrometry.** Data was collected in continuum mode from  $m/z$  100 to 1000 using an Agilent ESI-TOF. The capillary voltage was 3500 V, with a nebulizer gas flow of 15 L/min. The instrument was calibrated immediately before use. The data files were converted from the instrument format (.wiff) to the common data format, using the PESciEX data translator. The XCMS program (Ref 1) was used to align and analyze the LC-MS data. To confirm the identification of significant ions, we used a quadrupole-TOF (Agilent 6520 Accurate-Mass Q-TOF). Masses for CID were targeted from a mass list and fragmented during the chromatography run.

**Metabolite Database searching.** Metabolites were identified by exact mass ( $m/z$ ) using METLIN (<http://metlin.scripps.edu/>), Human Metabolome Project (<http://redpoll.pharmacy.ualberta.ca/hmdb/HMDB/>), Lipid Maps (<http://www.lipidmaps.org/>), Biological Magnetic Resonance Data Bank (<http://www.bmrwisc.edu/>) and KEGG ligand (<http://www.genome.jp/kegg/ligand.html>) databases.

**Supplemental figure S1:** Metabolomics analysis discovered multiple carnitine derivatives upregulated in *Vldlr*<sup>-/-</sup> retinas compared with WT retinas. (A) Metabolites from each isolated retina were extracted using acetone/methanol and applied to a capillary reversed phase (RP) or HILIC HPLC column interfaced to an ESI-TOF mass spectrometer in positive (+) and negative (-) ion mode to increase metabolite coverage (ref 1). Processing of raw data using the XCMS software resulted in time-aligned ion features, which were defined as a unique m/z at a unique retention time (ref 2). 3000-5000 features were found in the wild type (WT) and *VLDLR*<sup>-/-</sup> retina. Statistically significant differences were ranked using t-test statistical analyses in order to obtain quantitative information between WT and *Vldlr*<sup>-/-</sup> samples. (B) Identification of metabolites: accurate mass information by TOF (error < 5ppm) was used for metabolite database searching. Test compounds were selected for each metabolite identified, and their HPLC retention times and collision-induced dissociation (CID) fragmentation patterns (Q-TOF MS) were compared with identified metabolite for conclusive confirmation of identification. Blue asterisks correspond to parent ions, exemplifying the identification of endogenous L-carnitine.

Selected references:

1. Smith, C. A., Want, E. J., O'Maille, G., Abagyan, R. & Siuzdak, G. XCMS: processing mass spectrometry data for metabolite profiling using nonlinear peak alignment, matching, and identification. *Anal Chem* 78, 779-87 (2006).
2. Nordstrom, A., Want, E., Northen, T., Lehtio, J. & Siuzdak, G. Multiple ionization mass spectrometry strategy used to reveal the complexity of metabolomics. *Anal Chem* 80, 421-9 (2008).

## Supplemental Figure S1:

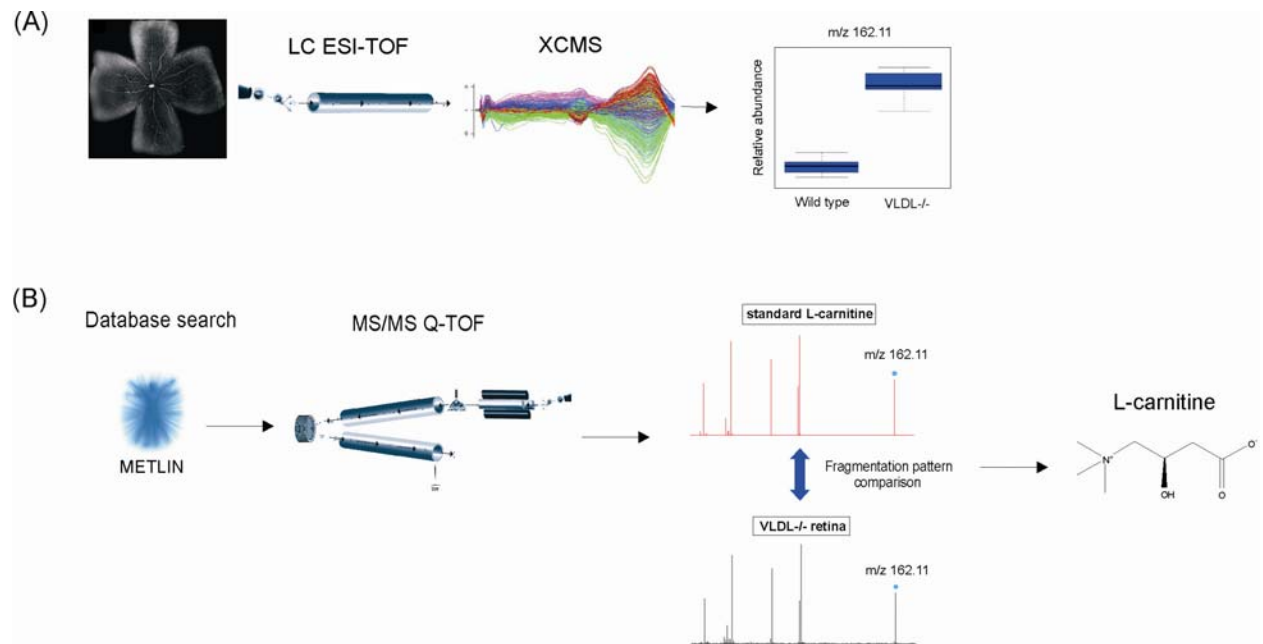

| Name                     | Molecular Formula | m/z observed | p-value                | Fold change | Up/down Regulation in <i>vldlr</i> <sup>-/-</sup> |
|--------------------------|-------------------|--------------|------------------------|-------------|---------------------------------------------------|
| L-carnitine              | C7H15NO3          | 162.11       | 5.45exp <sup>-6</sup>  | 2.58        | ↑                                                 |
| L-Acetylcarnitine        | C9H17NO4          | 204.12       | 1.03exp <sup>-10</sup> | 3.00        | ↑                                                 |
| Isovalerylcarnitine      | C12H23NO4         | 246.17       | 2.55exp <sup>-6</sup>  | 2.28        | ↑                                                 |
| Isohydrosorbylcarnitine  | C13H23NO4         | 258.16       | 2.90exp <sup>-10</sup> | 3.27        | ↑                                                 |
| Hexanoylcarnitine        | C13H25NO4         | 260.18       | 1.58exp <sup>-7</sup>  | 2.18        | ↑                                                 |
| Hydroxyoctanoylcarnitine | C15H29NO5         | 304.21       | 6.66exp <sup>-7</sup>  | 3.39        | ↑                                                 |
| PC(18:1/0:0)             | C26H52NO7P        | 522.35       | 9.81exp <sup>-6</sup>  | 3.17        | ↓                                                 |
| PC(10:0/20:0)            | C38H76NO8P        | 706.53       | 7.42exp <sup>-8</sup>  | 1.93        | ↓                                                 |
| TG(22:6/22:6/22:6)       | C69H98O6          | 1040.77      | 1.89exp <sup>-5</sup>  | 2.22        | ↓                                                 |
| DG(22:6/22:6)            | C47H68O5          | 730.54       | 6.94exp <sup>-4</sup>  | 2.20        | ↓                                                 |

**Supplemental table 1:** Large-scale microarray gene expression analysis was performed to test the expression of oxidative stress-related genes, particularly those involved in cellular defense mechanisms against oxidative stress. Overall, no differences in gene expression of these factors were found when comparing 3 week old *Vldlr*<sup>-/-</sup> mouse retinas to age-matched C57BL6/J wild-type retinas indicating that the observed increase in oxidative stress and subsequent neuronal degeneration is not directly related to the *Vldlr*<sup>-/-</sup> genetic defect, but rather is likely to be a consequence of the excessive intra- and subretinal NV that forms in the retinas of *Vldlr*<sup>-/-</sup> mice. Table 1 gives the raw data values of all the tested genes (obtained from the microarray analysis following the standard affymetrix protocol) that were found to be expressed in the retinas. Genes whose values differed >2-fold between *Vldlr*<sup>-/-</sup> and WT retinas are shown in red. Only one outlier, 9-cis-retinol dehydrogenase, demonstrated significantly different expression levels (>95%), although we have yet to determine a functional correlation between the expression levels of this gene and the *Vldlr*<sup>-/-</sup> retinal phenotype.

|                           | expression levels |          | fold change | Genbank     |                                                   |
|---------------------------|-------------------|----------|-------------|-------------|---------------------------------------------------|
| Gene Name                 | C57/Bl-6          | vldlr-/- | WT/vldlr    | accession # | Gene product                                      |
| Chaperones                |                   |          |             |             |                                                   |
| Hspa5                     | 1680              | 1734     | 0.97        | AJ002387    | BiP; chaperone                                    |
| Grpel2                    | 176               | 176      | 0.99        | AF041060    | co-chaperone mt-GrpE#2 precursor                  |
| Cct8                      | 415               | 523      | 0.79        | Z37164      | haperonin containing TCP-1, theta subunit         |
| Cctb                      | 163               | 211      | 0.77        | AB022156    | chaperonin containing TCP-1, beta subunit         |
| Cct7                      | 1076              | 1216     | 0.88        | Z31399      | chaperonin containing TCP-1, beta subunit         |
| Cctz-2                    | 88                | 49       | 1.80        | AB022086    | chaperonin containing TCP-1, zeta-2 subunit       |
| Cct5                      | 1496              | 1821     | 0.82        | Z31555      | chaperonin containing TCP-1, epsilon subunit      |
| heat shock proteins       |                   |          |             |             |                                                   |
| Hsf1                      | 193               | 131      | 1.47        | AF059275    | heat shock transcription factor 1                 |
| Hsf2                      | 17                | 15       | 1.11        | X61754      | heat shock transcription factor 2                 |
| Hsp60                     | 1974              | 2234     | 0.88        | X53584      | heat shock protein 60; groEL gene                 |
| Hsp70-3                   | 1196              | 934      | 1.28        | M12571      | heat shock protein, 68 kDa                        |
| Serpinh1                  | 157               | 122      | 1.28        | X60676      | heat shock protein; HSP47 gene                    |
| Hsp86-1                   | 8228              | 8536     | 0.96        | J04633      | heat shock protein, 86 kDa 1                      |
| Hsp84-1                   | 4109              | 3529     | 1.16        | M18186      | heat shock protein, 84 kDa 1                      |
| Dnajb1                    | 555               | 487      | 1.14        | AB028272    | heat shock protein 40                             |
| Hsc70-8                   | 2347              | 2699     | 0.87        | X54401      | heat shock protein, 70 kDa - 8                    |
| Hsp105                    | 807               | 790      | 1.02        | L40406      | heat shock protein, 105 kDa                       |
| Hsp70-2                   | 25                | 25       | 0.97        | M20567      | heat shock protein, 70 kDa - 2                    |
| crystallins               |                   |          |             |             |                                                   |
| Crybb2                    | 25                | 33       | 0.78        | M60559      | beta-B2 crystallin                                |
| Cryaa                     | 147               | 111      | 1.33        | J00376      | alpha-crystallin; crystallin                      |
| murine gamma E-crystallin | 217               | 150      | 1.45        | X57855      | gamma E-crystallin                                |
| Cryga                     | 9                 | 9        | 1.02        | K02587      | gamma A crystallin                                |
| CrygD                     | 126               | 84       | 1.50        | AJ224342    | gamma-D-crystallin                                |
| Crym                      | 312               | 517      | 0.60        | AF039391    | mu-crystallin                                     |
| alphaA-CRYBP1             | 185               | 239      | 0.78        | L36829      | alphaA-crystallin-binding protein I               |
| Crygs                     | 127               | 98       | 1.30        | AF032995    | gammaS-crystallin                                 |
| CrygB                     | 25                | 14       | 1.70        | Z22573      | gamma-B-crystallin                                |
| CrygF                     | 271               | 115      | 2.36        | AJ224343    | gamma-F-crystallin                                |
| Cryz                      | 139               | 191      | 0.73        | D78646      | zeta-crystallin/quinone reductase                 |
| peroxidases               |                   |          |             |             |                                                   |
| Mpo                       | 43                | 26       | 1.69        | X15378      | precursor myeloperoxidase                         |
| Gpx3                      | 152               | 193      | 0.79        | U13705      | plasma glutathione peroxidase precursor           |
| GSHPx                     | 316               | 299      | 1.06        | X03920      | glutathione peroxidase                            |
| Gpx4                      | 928               | 924      | 1.00        | D87896      | phospholipid hydroperoxide glutathione peroxidase |
| Tpo                       | 26                | 42       | 0.62        | X60703      | peroxidase                                        |
| Prdx2                     | 407               | 491      | 0.83        | U20611      | peroxidase                                        |
| Gpx2-ps1                  | 148               | 129      | 1.15        | X91864      | selenocysteine; glutathione peroxidase-GI         |
| reductases                |                   |          |             |             |                                                   |
| Rrm1                      | 108               | 126      | 0.86        | K02927      | ribonucleotide reductase M1                       |
| Th                        | 99                | 123      | 0.80        | M69200      | tyrosine hydroxylase; oxygen oxidoreductase       |
| NG28                      | 2731              | 2902     | 0.94        | AF110520    | NADH oxidoreductase                               |
| Mod1                      | 862               | 720      | 1.20        | J02652      | malate oxidoreductase                             |
| NG28                      | 229               | 224      | 1.02        | AF110520    | NADH oxidoreductase                               |
| NG28                      | 304               | 216      | 1.41        | AF110520    | NADH oxidoreductase                               |
| Rsd1-pending              | 338               | 231      | 1.47        | X95281      | retinal short-chain dehydrogenase/reductase       |
| Akr1e1                    | 109               | 149      | 0.73        | U68535      | aldo-keto reductase                               |
| Lorsdh                    | 28                | 40       | 0.69        | AJ224761    | lysine ketoglutarate reductase                    |
| Hmgcr                     | 390               | 400      | 0.97        | M62766      | HMG-CoA reductase                                 |
| Txnrd2                    | 73                | 68       | 1.08        | AB027566    | thioredoxin reductase 2                           |
| Fdxr                      | 116               | 93       | 1.25        | D49920      | Ferredoxin-NADP Reductase precursor               |
| Chr2                      | 44                | 20       | 2.14        | D26123      | carbonyl reductase                                |
| Scd1                      | 108               | 248      | 0.44        | M21285      | cytochrome b-5 reductase                          |
| Sqle                      | 762               | 917      | 0.83        | D42048      | squalene epoxidase                                |
| Nqo1                      | 43                | 43       | 1.00        | U12961      | NAD(P)H:menadione oxidoreductase                  |
| NG28                      | 2269              | 2825     | 0.80        | AF110520    | NADH oxidoreductase                               |
| Cbr1                      | 243               | 253      | 0.96        | U31966      | carbonyl reductase                                |
| NG28                      | 184               | 227      | 0.81        | AF110520    | NADH oxidoreductase                               |
| NG28                      | 87                | 107      | 0.81        | AF110520    | NADH oxidoreductase                               |
| Dhcr7                     | 162               | 185      | 0.87        | AF057368    | delta7-sterol reductase                           |
| Por                       | 382               | 416      | 0.92        | D17571      | NADPH-cytochrome P450 oxidoreductase              |
| Txnrd1                    | 277               | 284      | 0.98        | AB027565    | thioredoxin reductase 1                           |

| Gene Name                 | expression levels |          | fold change | Genbank<br>accession # | Gene product                                           |
|---------------------------|-------------------|----------|-------------|------------------------|--------------------------------------------------------|
|                           | C57/BL6           | vldlr-/- |             |                        |                                                        |
| <b>dehydrogenases</b>     |                   |          |             |                        |                                                        |
| Aldh1a1                   | 617               | 533      | 1.16        | M74570                 | aldehyde dehydrogenase II                              |
| Impdh2                    | 447               | 455      | 0.98        | M33934                 | inosine 5'-phosphate dehydrogenase 2                   |
| Rdh7                      | 57                | 41       | 1.40        | AF056194               | short-chain dehydrogenase CRAD2                        |
| Nqo1                      | 25                | 22       | 1.11        | M36660                 | NAD(P)H dehydrogenase, quinone 1                       |
| Gapd                      | 8484              | 9091     | 0.93        | M32599                 | glyceraldehyde-3-phosphate dehydrogenase               |
| G6pd-2                    | 432               | 486      | 0.89        | Z84471                 | glucose-6-phosphate dehydrogenase                      |
| Rdh5                      | 301               | 59       | 5.11        | AF033195               | 9-cis-retinol dehydrogenase                            |
| Bckdk                     | 478               | 454      | 1.05        | AF043070               | branched chain alpha ketoacid dehydrogenase kinase     |
| Ldh2                      | 548               | 662      | 0.83        | X51905                 | lactate dehydrogenase 2, B chain                       |
| Ugdh                      | 786               | 1170     | 0.67        | AF061017               | UDP-glucose dehydrogenase                              |
| Ke 6                      | 52                | 52       | 1.00        | U34072                 | steroid dehydrogenase                                  |
| Hsd3b1                    | 21                | 23       | 0.88        | M58567                 | 3-beta-hydroxysteroid dehydrogenase                    |
| Acads                     | 41                | 38       | 1.06        | L11163                 | short chain acyl-CoA dehydrogenase                     |
| Dhodh                     | 154               | 234      | 0.66        | AF029667               | dihydroorotate dehydrogenase                           |
| Gcdh                      | 758               | 613      | 1.24        | U18992                 | glutaryl-CoA dehydrogenase precursor                   |
| ldh1                      | 315               | 650      | 0.48        | AF020039               | NADP-dependent isocitrate dehydrogenase                |
| Acadm                     | 939               | 1262     | 0.74        | U07159                 | medium-chain acyl-CoA dehydrogenase                    |
| Glud                      | 312               | 306      | 1.02        | X57024                 | glutamate dehydrogenase (NAD(P)+)                      |
| Hsd3b4                    | 32                | 21       | 1.51        | L16919                 | 3-beta-hydroxysteroid dehydrogenase                    |
| ldh3g                     | 701               | 936      | 0.75        | U68564                 | NAD(H)-specific isocitrate dehydrogenase               |
| Hpgd                      | 81                | 96       | 0.85        | U44389                 | NAD(+)-dependent 15-hydroxyprostaglandin dehydrogenase |
| MDH                       | 3459              | 3343     | 1.03        | X07295                 | malate dehydrogenase                                   |
| Hsd17b12                  | 938               | 1323     | 0.71        | AF064635               | putative steroid dehydrogenase                         |
| Aldh1a7                   | 48                | 54       | 0.90        | U96401                 | aldehyde dehydrogenase Ahd-2-like                      |
| G6pdx                     | 359               | 467      | 0.77        | Z11911                 | glucose-6-phosphate dehydrogenase                      |
| Acadl                     | 45                | 36       | 1.25        | U21489                 | long-chain acyl-CoA dehydrogenase                      |
| Hadhsc                    | 171               | 188      | 0.91        | D29639                 | 3-hydroxyacyl CoA dehydrogenase                        |
| Aldh2                     | 244               | 213      | 1.14        | U07235                 | aldehyde dehydrogenase                                 |
| Ldh1                      | 10183             | 8568     | 1.19        | M17516                 | lactate dehydrogenase 1, A chain                       |
| Dld                       | 815               | 952      | 0.86        | U73445                 | dihydrolipoamide dehydrogenase                         |
| Mor2                      | 190               | 125      | 1.52        | M29462                 | malate dehydrogenase                                   |
| Hsd17b4                   | 228               | 354      | 0.65        | X89998                 | 17beta-hydroxysteroid dehydrogenase IV                 |
| Pdha1                     | 1034              | 1272     | 0.81        | M76727                 | pyruvate dehydrogenase                                 |
| Ndufa1                    | 7                 | 9        | 0.84        | Y07708                 | NADH dehydrogenase                                     |
| Impdh1                    | 2426              | 1696     | 1.43        | U00978                 | type I inosine monophosphate dehydrogenase             |
| Adh5                      | 891               | 1092     | 0.82        | M84147                 | alcohol dehydrogenase-B2                               |
| Gdm1                      | 99                | 115      | 0.86        | D50430                 | glycerol-3-phosphate dehydrogenase                     |
| aldh3                     | 35                | 59       | 0.59        | AF033034               | aldehyde dehydrogenase 3                               |
| Aldh3a2                   | 260               | 315      | 0.83        | U14390                 | aldehyde dehydrogenase                                 |
| <b>redoxins</b>           |                   |          |             |                        |                                                        |
| PrxII-2                   | 2618              | 2950     | 0.89        | AF032714               | type II peroxiredoxin protein 2                        |
| Prdx5-rs3                 | 435               | 595      | 0.73        | AF093853               | 1-Cys peroxiredoxin protein 2                          |
| Prdx5                     | 663               | 936      | 0.71        | AF093857               | 1-Cys peroxiredoxin protein                            |
| Txnl                      | 190               | 198      | 0.96        | AF052660               | thioredoxin-related protein                            |
| Txn1                      | 1083              | 1367     | 0.79        | X77585                 | thioredoxin-1                                          |
| Glrx1                     | 270               | 272      | 1.00        | AB013137               | glutaredoxin                                           |
| red-1                     | 29                | 31       | 0.92        | X92750                 | nucleoredoxin                                          |
| Prdx1                     | 1044              | 1482     | 0.70        | AB023564               | type I peroxiredoxin                                   |
| Txn2                      | 977               | 725      | 1.35        | U85089                 | thioredoxin-2                                          |
| <b>Unclassified genes</b> |                   |          |             |                        |                                                        |
| Pdcd8                     | 324               | 452      | 0.72        | AF100927               | apoptosis-inducing factor AIF                          |
| MnSOD                     | 149               | 221      | 0.67        | L35528                 | manganese superoxide dismutase                         |
| Fth                       | 3765              | 3782     | 1.00        | X52561                 | ferritin H subunit                                     |
| Sod1                      | 947               | 1000     | 0.95        | M35725                 | Cu-Zn-superoxide dismutase                             |
| Sqstm1                    | 975               | 1014     | 0.96        | U40930                 | oxidative stress-induced protein                       |
| Ftl1; Ftl-1               | 2271              | 2232     | 1.02        | L39879                 | ferritin L-subunit                                     |
